# Supplementary material for: Growth Hormones in Broad Bean (Vicia faba L.) and Radish (Raphanus raphanistrum subsp. sativus L.) Are Associated with Accumulated Concentrations of Perfluoroalkyl Substances
Source: MDPI journal article supplement (doi:10.3390/toxics11110922), 2023-11-11
Supplement: s1 [file s1]

# Growth Hormones in Broad Bean (*Vicia faba* L.) and Radish (*Raphanus raphanistrum* subsp. *sativus* L.) Are Associated with Accumulated Concentrations of Perfluoroalkyl Substances

Thimo Groffen <sup>1,\*</sup>, Niels Kuijper <sup>1</sup>, Sevgi Oden <sup>2</sup>, Tim Willems <sup>2</sup>, Lieven Bervoets <sup>1</sup> and Els Prinsen <sup>2</sup>

<sup>1</sup> ECOSPHERE, Department of Biology, University of Antwerp, Groenenborgerlaan 171, 2020 Antwerp, Belgium; ng.kuijper@student.maastrichtuniversity.nl (N.K.); lieven.bervoets@uantwerpen.be (L.B.)

<sup>2</sup> Integrated Molecular Plant Physiology Research (IMPRes), Department of Biology, University of Antwerp, Groenenborgerlaan 171, 2020 Antwerp, Belgium; sevgi.oden@uantwerpen.be (S.O.); tim.willems@uantwerpen.be (T.W.); els.prinsen@uantwerpen.be (E.P.)

\* Correspondence: thimo.groffen@uantwerpen.be; Tel.: +31-6-41-20-90-80

**Supplementary materials**

**Table S1.** Mean PFAS concentration ( $\pm$  standard deviation) in ng/g dw in the spiked soil.  $n = 3$ .

| PFAS    | Concentrations (ng/g dw) |
|---------|--------------------------|
| PFBA    | $8.07 \pm 0.598$         |
| PFPeA   | $7.29 \pm 0.434$         |
| PFHxA   | $8.84 \pm 0.721$         |
| PFHpA   | $10.5 \pm 1.09$          |
| PFOA    | $8.24 \pm 0.584$         |
| PFNA    | $7.70 \pm 0.311$         |
| PFDA    | $5.91 \pm 0.400$         |
| PFUnDA  | $6.63 \pm 0.696$         |
| PFDoDA  | $7.54 \pm 0.882$         |
| PFTTrDA | $6.87 \pm 0.543$         |
| PFTeDA  | $6.49 \pm 0.385$         |
| PFBS    | $6.77 \pm 0.857$         |
| PFHxS   | $10.8 \pm 1.23$          |
| PFOS    | $6.85 \pm 0.426$         |
| FBSA    | $6.18 \pm 0.577$         |

**Table S2.** Limits of quantification (LOQ) of the individual PFAS in plant matrices (ng/g dw).

| PFAS    | LOQ (ng/g dw) |
|---------|---------------|
| PFBA    | 1.26          |
| PFPeA   | 0.432         |
| PFHxA   | 0.792         |
| PFHpA   | 0.625         |
| PFOA    | 0.143         |
| PFNA    | 0.106         |
| PFDA    | 0.223         |
| PFUnDA  | 0.182         |
| PFDoDA  | 0.305         |
| PFTTrDA | 0.114         |
| PFTeDA  | 0.257         |
| PFBS    | 1.55          |
| PFHxS   | 1.90          |
| PFOS    | 0.0631        |
| FBSA    | 0.206         |

**Table S3.** MRM transitions, internal standards (ISTDs), cone voltages (V), and collision energy (eV) for the target perfluoroalkyl substances and their internal standards. Table adopted from Groffen et al. [46].

| Compound                                       | Precursor ion (m/z) | Product Ion (m/z)        |                          | Cone Voltage (V) for Diagnostic Transition 1 | Cone Voltage (V) for Diagnostic Transition 2 | Collision Energy (eV) for Diagnostic Transition 1 | Collision Energy (eV) for Diagnostic Transition 2 | Internal Standard (ISTD) Used for Quantification |
|------------------------------------------------|---------------------|--------------------------|--------------------------|----------------------------------------------|----------------------------------------------|---------------------------------------------------|---------------------------------------------------|--------------------------------------------------|
|                                                |                     | Diagnostic Product Ion 1 | Diagnostic Product Ion 2 |                                              |                                              |                                                   |                                                   |                                                  |
|                                                |                     | 1                        | 2                        |                                              |                                              |                                                   |                                                   |                                                  |
| PFBA                                           | 213                 | 169                      | 169                      | 19                                           | 19                                           | 19                                                | 50                                                | <sup>13</sup> C <sub>4</sub> -PFBA               |
| PFPeA                                          | 263                 | 219                      | 219                      | 15                                           | 15                                           | 10                                                | 45                                                | <sup>13</sup> C <sub>4</sub> -PFBA               |
| PFHxA                                          | 313                 | 269                      | 119                      | 19                                           | 19                                           | 21                                                | 65                                                | [1,2- <sup>13</sup> C <sub>2</sub> ]PFHxA        |
| PFHpA                                          | 363                 | 319                      | 169                      | 24                                           | 24                                           | 40                                                | 30                                                | [1,2- <sup>13</sup> C <sub>2</sub> ]PFHxA        |
| PFOA                                           | 413                 | 369                      | 169                      | 22                                           | 22                                           | 13                                                | 60                                                | [1,2,3,4- <sup>13</sup> C <sub>4</sub> ]PFOA     |
| PFNA                                           | 463                 | 419                      | 169                      | 28                                           | 28                                           | 17                                                | 20                                                | [1,2,3,4,5- <sup>13</sup> C <sub>5</sub> ]PFNA   |
| PFDA                                           | 513                 | 469                      | 219                      | 25                                           | 25                                           | 29                                                | 29                                                | [1,2- <sup>13</sup> C <sub>2</sub> ]PFDA         |
| PFUnDA                                         | 563                 | 519                      | 169                      | 18                                           | 18                                           | 30                                                | 35                                                | [1,2- <sup>13</sup> C <sub>2</sub> ]PFUnDA       |
| PFDoDA                                         | 613                 | 569                      | 319                      | 22                                           | 22                                           | 21                                                | 30                                                | [1,2- <sup>13</sup> C <sub>2</sub> ]PFDoDA       |
| PFTTrDA                                        | 663                 | 619                      | 319                      | 26                                           | 26                                           | 21                                                | 30                                                | [1,2- <sup>13</sup> C <sub>2</sub> ]PFDoDA       |
| PFTeDA                                         | 713                 | 669                      | 169                      | 28                                           | 28                                           | 21                                                | 21                                                | [1,2- <sup>13</sup> C <sub>2</sub> ]PFDoDA       |
| PFBS                                           | 299                 | 80                       | 99                       | 40                                           | 40                                           | 65                                                | 45                                                | <sup>18</sup> O <sub>2</sub> -PFHxS              |
| PFHxS                                          | 399                 | 80                       | 99                       | 22                                           | 22                                           | 30                                                | 60                                                | <sup>18</sup> O <sub>2</sub> -PFHxS              |
| PFOS                                           | 499                 | 80                       | 99                       | 60                                           | 60                                           | 58                                                | 58                                                | [1,2,3,4- <sup>13</sup> C <sub>4</sub> ]PFOS     |
| FBSA                                           | 298                 | 219                      | 78                       | 34                                           | 40                                           | 27                                                | 38                                                | <sup>13</sup> C <sub>4</sub> -PFBA               |
| <sup>13</sup> C <sub>4</sub> -PFBA             | 217                 | 172                      | 172                      | 19                                           | 19                                           | 19                                                | 50                                                |                                                  |
| [1,2- <sup>13</sup> C <sub>2</sub> ]PFHxA      | 315                 | 269                      | 119                      | 19                                           | 19                                           | 21                                                | 65                                                |                                                  |
| [1,2,3,4- <sup>13</sup> C <sub>4</sub> ]PFOA   | 417                 | 372                      | 172                      | 22                                           | 22                                           | 13                                                | 60                                                |                                                  |
| [1,2,3,4,5- <sup>13</sup> C <sub>5</sub> ]PFNA | 468                 | 423                      | 172                      | 28                                           | 28                                           | 17                                                | 20                                                |                                                  |
| [1,2- <sup>13</sup> C <sub>2</sub> ]PFDA       | 515                 | 470                      | 220                      | 25                                           | 25                                           | 29                                                | 29                                                |                                                  |
| [1,2- <sup>13</sup> C <sub>2</sub> ]PFUnDA     | 565                 | 520                      | 170                      | 18                                           | 18                                           | 32                                                | 35                                                |                                                  |
| [1,2- <sup>13</sup> C <sub>2</sub> ]PFDoDA     | 615                 | 570                      | 320                      | 22                                           | 22                                           | 21                                                | 30                                                |                                                  |
| <sup>18</sup> O <sub>2</sub> -PFHxS            | 403                 | 84                       | 103                      | 22                                           | 22                                           | 30                                                | 60                                                |                                                  |
| [1,2,3,4- <sup>13</sup> C <sub>4</sub> ]PFOS   | 503                 | 80                       | 99                       | 60                                           | 60                                           | 58                                                | 58                                                |                                                  |

**Table S4.** PFAS concentrations (ng/g dw) and detection frequency (%) in the various tissues of exposed and control plants of *V. faba*. Values below LOQ are indicated as <LOQ. Ranges show minimum and maximum concentrations.

| Tissue                                                                                 | Compound | Control |            |                     | Exposed |            |                     |
|----------------------------------------------------------------------------------------|----------|---------|------------|---------------------|---------|------------|---------------------|
|                                                                                        |          | Median  | Range      | Detection Frequency | Median  | Range      | Detection Frequency |
| Upper leaves<br>( <i>n</i> = 13<br>for<br>control and<br><i>n</i> = 14<br>for exposed) | PFBA     | <LOQ    | <LOQ–<LOQ  | 0                   | 32.3    | 13.9–72.2  | 100                 |
|                                                                                        | PFPeA    | <LOQ    | <LOQ–<LOQ  | 0                   | 8.88    | 3.95–12.6  | 100                 |
|                                                                                        | PFHxA    | <LOQ    | <LOQ–<LOQ  | 0                   | 4.00    | 1.78–6.49  | 100                 |
|                                                                                        | PFHpA    | <LOQ    | <LOQ–<LOQ  | 0                   | <LOQ    | <LOQ–2.38  | 7                   |
|                                                                                        | PFOA     | 1.23    | 0.333–2.00 | 100                 | 1.84    | 0.880–3.21 | 100                 |
|                                                                                        | PFNA     | <LOQ    | <LOQ–0.224 | 8                   | <LOQ    | <LOQ–<LOQ  | 0                   |
|                                                                                        | PFDA     | 1.07    | 0.752–1.62 | 100                 | 1.46    | 0.687–2.36 | 100                 |
|                                                                                        | PFUnDA   | 0.501   | <LOQ–0.688 | 85                  | <LOQ    | <LOQ–0.770 | 36                  |
|                                                                                        | PFDoDA   | 1.38    | <LOQ–1.82  | 85                  | 1.72    | <LOQ–4.64  | 86                  |
|                                                                                        | PFTTrDA  | <LOQ    | <LOQ–0.431 | 15                  | <LOQ    | <LOQ–<LOQ  | 0                   |
|                                                                                        | PFTeDA   | <LOQ    | <LOQ–1.21  | 8                   | <LOQ    | <LOQ–3.37  | 14                  |
|                                                                                        | PFBS     | <LOQ    | <LOQ–<LOQ  | 0                   | 17.9    | 3.96–39.3  | 100                 |
|                                                                                        | PFHxS    | <LOQ    | <LOQ–<LOQ  | 0                   | <LOQ    | <LOQ–<LOQ  | 0                   |
|                                                                                        | PFOS     | <LOQ    | <LOQ–<LOQ  | 0                   | <LOQ    | <LOQ–<LOQ  | 0                   |
|                                                                                        | FBSA     | <LOQ    | <LOQ–<LOQ  | 0                   | <LOQ    | <LOQ–<LOQ  | 0                   |
| Lower leaves<br>( <i>n</i> = 15<br>for<br>both<br>treatments)                          | PFBA     | <LOQ    | <LOQ–<LOQ  | 0                   | 34.5    | <LOQ–72.0  | 87                  |
|                                                                                        | PFPeA    | <LOQ    | <LOQ–<LOQ  | 0                   | 7.68    | <LOQ–19.5  | 93                  |
|                                                                                        | PFHxA    | <LOQ    | <LOQ–<LOQ  | 0                   | 5.17    | <LOQ–9.66  | 93                  |
|                                                                                        | PFHpA    | <LOQ    | <LOQ–<LOQ  | 0                   | <LOQ    | <LOQ–3.31  | 33                  |
|                                                                                        | PFOA     | 1.64    | 1.11–6.85  | 100                 | 1.18    | 0.571–3.54 | 100                 |
|                                                                                        | PFNA     | <LOQ    | <LOQ–<LOQ  | 0                   | <LOQ    | <LOQ–<LOQ  | 0                   |
|                                                                                        | PFDA     | 1.26    | <LOQ–2.54  | 93                  | 1.35    | <LOQ–2.51  | 93                  |
|                                                                                        | PFUnDA   | <LOQ    | <LOQ–0.774 | 33                  | <LOQ    | <LOQ–0.786 | 27                  |
|                                                                                        | PFDoDA   | 1.50    | <LOQ–6.03  | 63                  | 1.36    | <LOQ–2.35  | 87                  |
|                                                                                        | PFTTrDA  | <LOQ    | <LOQ–<LOQ  | 0                   | <LOQ    | <LOQ–0.381 | 7                   |
|                                                                                        | PFTeDA   | <LOQ    | <LOQ–<LOQ  | 0                   | <LOQ    | <LOQ–<LOQ  | 0                   |
|                                                                                        | PFBS     | <LOQ    | <LOQ–<LOQ  | 0                   | 40.6    | <LOQ–69.7  | 93                  |
|                                                                                        | PFHxS    | <LOQ    | <LOQ–<LOQ  | 0                   | <LOQ    | <LOQ–<LOQ  | 0                   |
|                                                                                        | PFOS     | <LOQ    | <LOQ–<LOQ  | 0                   | <LOQ    | <LOQ–0.191 | 7                   |
|                                                                                        | FBSA     | <LOQ    | <LOQ–<LOQ  | 0                   | <LOQ    | <LOQ–<LOQ  | 0                   |
| Stem<br>( <i>n</i> = 15<br>for<br>both<br>treatments)                                  | PFBA     | <LOQ    | <LOQ–<LOQ  | 0                   | <LOQ    | <LOQ–22.0  | 53                  |
|                                                                                        | PFPeA    | <LOQ    | <LOQ–<LOQ  | 0                   | <LOQ    | <LOQ–5.41  | 27                  |
|                                                                                        | PFHxA    | <LOQ    | <LOQ–1.78  | 13                  | <LOQ    | <LOQ–2.40  | 47                  |
|                                                                                        | PFHpA    | <LOQ    | <LOQ–<LOQ  | 0                   | <LOQ    | <LOQ–<LOQ  | 0                   |
|                                                                                        | PFOA     | 2.52    | 0.434–5.05 | 100                 | 2.64    | <LOQ–5.10  | 93                  |
|                                                                                        | PFNA     | <LOQ    | <LOQ–0.844 | 7                   | <LOQ    | <LOQ–<LOQ  | 0                   |
|                                                                                        | PFDA     | 1.09    | <LOQ–2.49  | 87                  | 1.41    | <LOQ–2.54  | 93                  |
|                                                                                        | PFUnDA   | 0.349   | <LOQ–1.51  | 53                  | <LOQ    | <LOQ–0.886 | 40                  |
|                                                                                        | PFDoDA   | 1.10    | <LOQ–3.81  | 80                  | 1.21    | <LOQ–3.31  | 80                  |
|                                                                                        | PFTTrDA  | <LOQ    | <LOQ–7.00  | 7                   | <LOQ    | <LOQ–<LOQ  | 0                   |
|                                                                                        | PFTeDA   | <LOQ    | <LOQ–4.42  | 7                   | <LOQ    | <LOQ–<LOQ  | 0                   |
|                                                                                        | PFBS     | <LOQ    | <LOQ–<LOQ  | 0                   | <LOQ    | <LOQ–<LOQ  | 0                   |
|                                                                                        | PFHxS    | <LOQ    | <LOQ–<LOQ  | 0                   | <LOQ    | <LOQ–<LOQ  | 0                   |
|                                                                                        | PFOS     | <LOQ    | <LOQ–<LOQ  | 0                   | <LOQ    | <LOQ–<LOQ  | 0                   |
|                                                                                        | FBSA     | <LOQ    | <LOQ–<LOQ  | 0                   | <LOQ    | <LOQ–<LOQ  | 0                   |

|                                                                                  |         |       |            |     |      |            |     |
|----------------------------------------------------------------------------------|---------|-------|------------|-----|------|------------|-----|
| Flower<br>( <i>n</i> = 13<br>for<br>control and<br><i>n</i> = 15<br>for exposed) | PFBA    | <LOQ  | <LOQ-<LOQ  | 0   | 17.8 | 4.07-78.5  | 100 |
|                                                                                  | PFPeA   | <LOQ  | <LOQ-<LOQ  | 0   | 2.92 | <LOQ-19.7  | 93  |
|                                                                                  | PFHxA   | <LOQ  | <LOQ-9.25  | 7   | 2.26 | <LOQ-10.8  | 87  |
|                                                                                  | PFHpA   | <LOQ  | <LOQ-<LOQ  | 0   | <LOQ | <LOQ-<LOQ  | 0   |
|                                                                                  | PFOA    | 2.22  | 1.17-18.7  | 100 | 2.75 | 1.20-11.7  | 100 |
|                                                                                  | PFNA    | <LOQ  | <LOQ-<LOQ  | 0   | <LOQ | <LOQ-<LOQ  | 0   |
|                                                                                  | PFDA    | 1.65  | 1.15-11.8  | 100 | 1.38 | 0.940-7.36 | 100 |
|                                                                                  | PFUnDA  | <LOQ  | <LOQ-0.946 | 33  | <LOQ | <LOQ-0.933 | 40  |
|                                                                                  | PFDoDA  | 1.82  | 0.783-22.0 | 100 | 1.06 | <LOQ-20.2  | 73  |
|                                                                                  | PFTTrDA | <LOQ  | <LOQ-<LOQ  | 0   | <LOQ | <LOQ-<LOQ  | 0   |
|                                                                                  | PFTeDA  | <LOQ  | <LOQ-<LOQ  | 0   | <LOQ | <LOQ-<LOQ  | 0   |
|                                                                                  | PFBS    | <LOQ  | <LOQ-<LOQ  | 0   | <LOQ | <LOQ-<LOQ  | 0   |
|                                                                                  | PFHxS   | <LOQ  | <LOQ-<LOQ  | 0   | <LOQ | <LOQ-<LOQ  | 0   |
|                                                                                  | PFOS    | <LOQ  | <LOQ-<LOQ  | 0   | <LOQ | <LOQ-<LOQ  | 0   |
|                                                                                  | FBSA    | <LOQ  | <LOQ-<LOQ  | 0   | <LOQ | <LOQ-<LOQ  | 0   |
| Apex<br>( <i>n</i> = 15<br>for<br>both<br>treatments)                            | PFBA    | <LOQ  | <LOQ-<LOQ  | 0   | 16.4 | <LOQ-61.4  | 93  |
|                                                                                  | PFPeA   | <LOQ  | <LOQ-<LOQ  | 0   | 2.67 | <LOQ-7.48  | 93  |
|                                                                                  | PFHxA   | <LOQ  | <LOQ-<LOQ  | 0   | 1.67 | <LOQ-4.34  | 87  |
|                                                                                  | PFHpA   | <LOQ  | <LOQ-<LOQ  | 0   | <LOQ | <LOQ-<LOQ  | 0   |
|                                                                                  | PFOA    | 1.05  | 0.425-2.08 | 100 | 1.32 | 0.736-3.62 | 100 |
|                                                                                  | PFNA    | <LOQ  | <LOQ-<LOQ  | 0   | <LOQ | <LOQ-<LOQ  | 0   |
|                                                                                  | PFDA    | 1.17  | 0.864-1.89 | 100 | 1.40 | 0.837-6.00 | 100 |
|                                                                                  | PFUnDA  | 0.369 | <LOQ-0.771 | 53  | <LOQ | <LOQ-0.567 | 47  |
|                                                                                  | PFDoDA  | 0.957 | <LOQ-2.24  | 80  | 1.12 | <LOQ-11.7  | 80  |
|                                                                                  | PFTTrDA | <LOQ  | <LOQ-<LOQ  | 0   | <LOQ | <LOQ-<LOQ  | 0   |
|                                                                                  | PFTeDA  | <LOQ  | <LOQ-0.798 | 7   | <LOQ | <LOQ-<LOQ  | 0   |
|                                                                                  | PFBS    | <LOQ  | <LOQ-<LOQ  | 0   | <LOQ | <LOQ-<LOQ  | 0   |
|                                                                                  | PFHxS   | <LOQ  | <LOQ-<LOQ  | 0   | <LOQ | <LOQ-<LOQ  | 0   |
|                                                                                  | PFOS    | <LOQ  | <LOQ-<LOQ  | 0   | <LOQ | <LOQ-<LOQ  | 0   |
|                                                                                  | FBSA    | <LOQ  | <LOQ-<LOQ  | 0   | <LOQ | <LOQ-2.32  | 13  |

**Table S5.** PFAS concentrations (ng/g dw) and detection frequency (%) in the various tissues of exposed and control plants of *R. raphanistrum*. Values below LOQ are indicated as <LOQ. Ranges show minimum and maximum concentrations.

| Tissue                                                 | Compound | Control |            |                     | Exposed |            |                     |
|--------------------------------------------------------|----------|---------|------------|---------------------|---------|------------|---------------------|
|                                                        |          | Median  | Range      | Detection Frequency | Median  | Range      | Detection Frequency |
| Leaf<br>( <i>n</i> = 15<br>for<br>both<br>treatments)  | PFBA     | <LOQ    | <LOQ–16.1  | 7                   | 32.5    | <LOQ–59.7  | 87                  |
|                                                        | PFPeA    | <LOQ    | <LOQ–4.23  | 7                   | 9.42    | <LOQ–16.5  | 87                  |
|                                                        | PFHxA    | <LOQ    | <LOQ–3.38  | 7                   | 6.07    | <LOQ–13.9  | 87                  |
|                                                        | PFHpA    | <LOQ    | <LOQ–<LOQ  | 0                   | <LOQ    | <LOQ–<LOQ  | 0                   |
|                                                        | PFOA     | 1.73    | <LOQ–3.12  | 93                  | 1.33    | 0.400–4.45 | 100                 |
|                                                        | PFNA     | <LOQ    | <LOQ–<LOQ  | 0                   | <LOQ    | <LOQ–<LOQ  | 0                   |
|                                                        | PFDA     | 1.24    | 0.579–1.89 | 100                 | 1.36    | 0.710–2.25 | 100                 |
|                                                        | PFUnDA   | <LOQ    | <LOQ–0.544 | 40                  | 0.357   | <LOQ–0.709 | 60                  |
|                                                        | PFDoDA   | 1.11    | <LOQ–1.72  | 80                  | 1.21    | 0.758–4.64 | 100                 |
|                                                        | PFTTrDA  | <LOQ    | <LOQ–0.316 | 7                   | <LOQ    | <LOQ–<LOQ  | 0                   |
|                                                        | PFTeDA   | <LOQ    | <LOQ–1.63  | 7                   | <LOQ    | <LOQ–<LOQ  | 0                   |
|                                                        | PFBS     | <LOQ    | <LOQ–8.72  | 7                   | 15.5    | <LOQ–26.2  | 87                  |
|                                                        | PFHxS    | <LOQ    | <LOQ–<LOQ  | 0                   | <LOQ    | <LOQ–<LOQ  | 0                   |
|                                                        | PFOS     | <LOQ    | <LOQ–0.168 | 7                   | <LOQ    | <LOQ–<LOQ  | 0                   |
|                                                        | FBSA     | <LOQ    | <LOQ–<LOQ  | 0                   | <LOQ    | <LOQ–<LOQ  | 0                   |
| Tuber<br>( <i>n</i> = 15<br>for<br>both<br>treatments) | PFBA     | <LOQ    | <LOQ–<LOQ  | 0                   | 3.15    | <LOQ–37.6  | 47                  |
|                                                        | PFPeA    | <LOQ    | <LOQ–<LOQ  | 0                   | <LOQ    | <LOQ–15.6  | 33                  |
|                                                        | PFHxA    | <LOQ    | <LOQ–2.85  | 7                   | <LOQ    | <LOQ–6.09  | 40                  |
|                                                        | PFHpA    | <LOQ    | <LOQ–<LOQ  | 0                   | <LOQ    | <LOQ–<LOQ  | 0                   |
|                                                        | PFOA     | 3.00    | 1.14–6.17  | 100                 | 0.817   | <LOQ–3.31  | 93                  |
|                                                        | PFNA     | <LOQ    | <LOQ–<LOQ  | 0                   | <LOQ    | <LOQ–0.466 | 27                  |
|                                                        | PFDA     | 0.984   | <LOQ–1.71  | 87                  | 1.00    | 0.821–1.38 | 100                 |
|                                                        | PFUnDA   | <LOQ    | <LOQ–0.610 | 27                  | 0.465   | <LOQ–0.740 | 67                  |
|                                                        | PFDoDA   | 0.914   | <LOQ–1.74  | 80                  | 1.26    | 0.573–2.39 | 100                 |
|                                                        | PFTTrDA  | <LOQ    | <LOQ–<LOQ  | 0                   | <LOQ    | <LOQ–0.979 | 27                  |
|                                                        | PFTeDA   | <LOQ    | <LOQ–<LOQ  | 0                   | <LOQ    | <LOQ–<LOQ  | 0                   |
|                                                        | PFBS     | <LOQ    | <LOQ–<LOQ  | 0                   | <LOQ    | <LOQ–27.3  | 33                  |
|                                                        | PFHxS    | <LOQ    | <LOQ–<LOQ  | 0                   | <LOQ    | <LOQ–<LOQ  | 0                   |
|                                                        | PFOS     | <LOQ    | <LOQ–<LOQ  | 0                   | <LOQ    | <LOQ–<LOQ  | 0                   |
|                                                        | FBSA     | <LOQ    | <LOQ–<LOQ  | 0                   | <LOQ    | <LOQ–<LOQ  | 0                   |
| Root<br>( <i>n</i> = 15<br>for<br>both<br>treatments)  | PFBA     | <LOQ    | <LOQ–<LOQ  | 0                   | <LOQ    | <LOQ–4.92  | 20                  |
|                                                        | PFPeA    | <LOQ    | <LOQ–<LOQ  | 0                   | 1.15    | <LOQ–2.45  | 67                  |
|                                                        | PFHxA    | <LOQ    | <LOQ–1.91  | 7                   | 2.98    | <LOQ–5.79  | 93                  |
|                                                        | PFHpA    | <LOQ    | <LOQ–<LOQ  | 0                   | <LOQ    | <LOQ–3.79  | 13                  |
|                                                        | PFOA     | 0.774   | <LOQ–1.50  | 80                  | 3.31    | 1.96–6.85  | 100                 |
|                                                        | PFNA     | <LOQ    | <LOQ–0.250 | 7                   | 1.29    | 0.894–2.52 | 100                 |
|                                                        | PFDA     | 1.05    | 0.549–2.08 | 100                 | 2.13    | 1.30–3.61  | 100                 |
|                                                        | PFUnDA   | 0.425   | <LOQ–0.808 | 60                  | 0.687   | <LOQ–1.24  | 87                  |
|                                                        | PFDoDA   | 0.907   | <LOQ–3.10  | 93                  | 2.10    | <LOQ–3.04  | 93                  |
|                                                        | PFTTrDA  | <LOQ    | <LOQ–0.663 | 47                  | 0.991   | <LOQ–1.65  | 93                  |
|                                                        | PFTeDA   | <LOQ    | <LOQ–<LOQ  | 0                   | 1.70    | <LOQ–3.24  | 73                  |
|                                                        | PFBS     | <LOQ    | <LOQ–<LOQ  | 0                   | <LOQ    | <LOQ–<LOQ  | 0                   |
|                                                        | PFHxS    | <LOQ    | <LOQ–<LOQ  | 0                   | <LOQ    | <LOQ–<LOQ  | 0                   |
|                                                        | PFOS     | <LOQ    | <LOQ–0.583 | 40                  | 0.327   | <LOQ–0.679 | 80                  |
|                                                        | FBSA     | <LOQ    | <LOQ–<LOQ  | 0                   | <LOQ    | <LOQ–4.44  | 27                  |

**Table S6.** Translocation factors of PFAS in exposed *R. rapanistrum* (*n* = 15).

| PFAS   | Translocation Factor |
|--------|----------------------|
| PFPeA  | 6.94                 |
| PFHxA  | 1.68                 |
| PFOA   | 0.51                 |
| PFDA   | 0.56                 |
| PFUnDA | 0.46                 |
| PFDoDA | 0.67                 |

**Table S7.** Plant hormone levels (pmol/g dw) and detection frequency (%) in the upper leaves and apex of exposed and control plants of *V. faba*. Values below LOQ are indicated as <LOQ. Ranges show minimum and maximum concentrations. *n* = 5 per tissue for each of the treatments.

| Tissue     | Compound     |                | Control |              |                     | Exposed |              |                     |
|------------|--------------|----------------|---------|--------------|---------------------|---------|--------------|---------------------|
|            |              |                | Median  | Range        | Detection Frequency | Median  | Range        | Detection Frequency |
| Upper leaf | Cytokinines  | Trans-ZR       | <LOQ    | <LOQ–39.3    | 40                  | <LOQ    | <LOQ–15.3    | 40                  |
|            |              | iPA            | 0.891   | <LOQ–9.85    | 80                  | 1.07    | <LOQ–8.59    | 80                  |
|            |              | ACC            | 28.8    | 26.4–39.0    | 100                 | 27.8    | 19.0–46.9    | 100                 |
|            | ACC          | ACC-Conjugates | 39.7    | <LOQ–132     | 80                  | 55.3    | 46.8–288     | 100                 |
|            |              | IAA            | 34.6    | 14.1–90.9    | 100                 | 17.1    | 10.6–43.9    | 100                 |
|            | IAA          | IAA-Conjugates | 109     | 11.5–4029    | 100                 | 82.3    | <LOQ–95.9    | 80                  |
|            |              | JA             | 82.5    | <LOQ–404     | 60                  | 70.1    | <LOQ–333     | 80                  |
|            | Gibberellins | GA1            | 24.9    | 6.83–68.8    | 100                 | 33.1    | 11.2–103     | 100                 |
|            |              | GA7            | 1248    | 679–3155     | 100                 | 463     | 302–1936     | 100                 |
|            |              | GA8            | 31.0    | <LOQ–110     | 60                  | <LOQ    | <LOQ–39.4    | 40                  |
|            |              | GA12           | 1490    | 13.0–10,238  | 100                 | 1254    | 7.96–9877    | 100                 |
|            |              | GA15           | 1229    | 542–1425     | 100                 | 666     | 534–1027     | 100                 |
|            |              | GA19           | 62.0    | 20.8–186     | 100                 | 68.1    | 46.3–113     | 100                 |
|            |              | GA20           | <LOQ    | <LOQ–37.1    | 40                  | <LOQ    | <LOQ–29.5    | 40                  |
|            | MET          | MET            | 446     | 231–840      | 100                 | 298     | 211–651      | 100                 |
|            | ABA          | ABA            | 123     | <LOQ–217     | 60                  | 204     | 48.3–397     | 100                 |
| Apex       | Cytokinines  | Trans-ZR       | 207     | <LOQ–437     | 80                  | 286     | <LOQ–1130    | 80                  |
|            |              | IPA            | 167     | 2.29–976     | 100                 | 81.9    | 1.56–243     | 100                 |
|            |              | ACC            | 52.9    | 19.0–61.3    | 100                 | 44.0    | 30.6–86.7    | 100                 |
|            | ACC          | Conjugates     | 60.1    | <LOQ–190     | 80                  | 51.8    | 41.9–107     | 100                 |
|            |              | IAA            | 90.7    | 52.1–111     | 100                 | 95.6    | 34.8–143     | 100                 |
|            | IAA          | Conjugates     | 219     | <LOQ–405     | 80                  | 19.4    | <LOQ–495     | 60                  |
|            |              | JA             | 60.2    | <LOQ–164     | 80                  | 5.48    | 0.465–80.3   | 100                 |
|            | Gibberellins | GA1            | 49.6    | 28.2–114     | 100                 | 11.9    | 4.89–60.1    | 100                 |
|            |              | GA7            | 3018    | 1426–19,217  | 100                 | 3123    | 1826–12,204  | 100                 |
|            |              | GA8            | 73.4    | <LOQ–662     | 80                  | 137     | <LOQ–190     | 80                  |
|            |              | GA12           | 13,793  | 13.8–270,149 | 100                 | 128,498 | 92.1–305,121 | 100                 |
|            |              | GA15           | 2887    | 1863–5197    | 100                 | 1804    | 1631–2783    | 100                 |
|            |              | GA19           | 25.9    | <LOQ–255     | 80                  | 77.8    | 61.0–115     | 100                 |
|            |              | GA20           | 66.7    | 41.1–875     | 100                 | 94.2    | 25.7–182     | 100                 |
|            | MET          | MET            | 2235    | 1010–2856    | 100                 | 1301    | 193–1619     | 100                 |
|            | ABA          | ABA            | 80.6    | 37.7–971     | 100                 | 896     | 53.3–6643    | 100                 |

**Table S8.** Plant hormone levels (pmol/g dw) and detection frequency (%) in the tubers and leaves of exposed and control plants of *R. raphanistrum*. Values below LOQ are indicated as <LOQ. Ranges show minimum and maximum concentrations. *n* = 5 per tissue for each of the treatments.

| Tissue | Compound     |            | Control |             |                     | Exposed |             |                     |
|--------|--------------|------------|---------|-------------|---------------------|---------|-------------|---------------------|
|        |              |            | Median  | Range       | Detection Frequency | Median  | Range       | Detection Frequency |
| Tuber  | Cytokinines  | Trans-ZR   | <LOQ    | <LOQ–5.83   | 40                  | 1.47    | <LOQ–9.76   | 60                  |
|        |              | IPA        | 5.94    | <LOQ–39.2   | 80                  | 6.65    | <LOQ–37.3   | 80                  |
|        | ACC          | ACC        | 90.4    | <LOQ–365    | 80                  | 816     | 90.3–1208   | 100                 |
|        |              | Conjugates | 283     | <LOQ–915    | 60                  | 816     | <LOQ–1208   | 80                  |
|        | IAA          | IAA        | 10.8    | 7.89–34.4   | 100                 | 73.7    | 10.1–3245   | 100                 |
|        |              | Conjugates | 0.0234  | <LOQ–236    | 60                  | 110     | <LOQ–281    | 80                  |
|        | JA           | JA         | <LOQ    | <LOQ–0.0889 | 20                  | 38.2    | 0.115–464   | 100                 |
|        |              | GA1        | 10.2    | 7.53–43.2   | 100                 | 12.9    | <LOQ–37.4   | 60                  |
|        | Gibberellins | GA7        | 257     | 172–463     | 100                 | 255     | <LOQ–411    | 80                  |
|        |              | GA8        | <LOQ    | <LOQ–<LOQ   | 0                   | <LOQ    | <LOQ - <LOQ | 0                   |
|        |              | GA12       | <LOQ    | <LOQ–12.5   | 40                  | <LOQ    | <LOQ–2621   | 20                  |
|        |              | GA15       | 798     | 449–3113    | 100                 | 1308    | <LOQ–3203   | 80                  |
|        |              | GA19       | <LOQ    | <LOQ–6.72   | 20                  | <LOQ    | <LOQ–<LOQ   | 0                   |
|        |              | GA20       | 9.86    | <LOQ–14.3   | 80                  | 10.9    | <LOQ–16.9   | 80                  |
|        | MET          | MET        | 346     | 165–772     | 100                 | 714     | 235–1562    | 100                 |
|        | ABA          | ABA        | 107     | 75.3–594    | 100                 | 96.4    | <LOQ–544    | 80                  |
| Leaves | Cytokinines  | Trans-ZR   | <LOQ    | <LOQ–<LOQ   | 0                   | <LOQ    | <LOQ–11.1   | 20                  |
|        |              | IPA        | <LOQ    | <LOQ–5.21   | 40                  | <LOQ    | <LOQ–2.65   | 40                  |
|        | ACC          | ACC        | 145     | <LOQ–564    | 80                  | 245     | 89.5–387    | 100                 |
|        |              | Conjugates | 244     | <LOQ–680    | 60                  | 379     | <LOQ–571    | 80                  |
|        | IAA          | IAA        | 49.1    | 21.3–69.3   | 100                 | 66.5    | 18.4–7606   | 100                 |
|        |              | Conjugates | 5196    | <LOQ–74,403 | 80                  | 2512    | <LOQ–5218   | 80                  |
|        | JA           | JA         | 0.189   | <LOQ–161    | 60                  | 1.05    | <LOQ–2405   | 80                  |
|        |              | GA1        | 18.0    | <LOQ–99.7   | 80                  | 11.3    | <LOQ–133    | 60                  |
|        | Gibberellins | GA7        | 570     | 384–1472    | 100                 | 254     | <LOQ–419    | 80                  |
|        |              | GA8        | 41.3    | <LOQ–508    | 60                  | <LOQ    | <LOQ–1396   | 20                  |
|        |              | GA12       | 5.27    | <LOQ–668    | 60                  | 16.8    | <LOQ–1666   | 60                  |
|        |              | GA15       | 645     | 497–3337    | 100                 | 446     | <LOQ–3614   | 80                  |
|        |              | GA19       | <LOQ    | <LOQ–11.4   | 40                  | <LOQ    | <LOQ–10.4   | 40                  |
|        |              | GA20       | 22.5    | 15.9–76.7   | 100                 | 27.6    | <LOQ–40.0   | 80                  |
|        | MET          | MET        | 314     | 245–539     | 100                 | 347     | 166–775     | 100                 |
|        | ABA          | ABA        | 42.2    | 27.4–339    | 100                 | 39.7    | <LOQ–203    | 80                  |



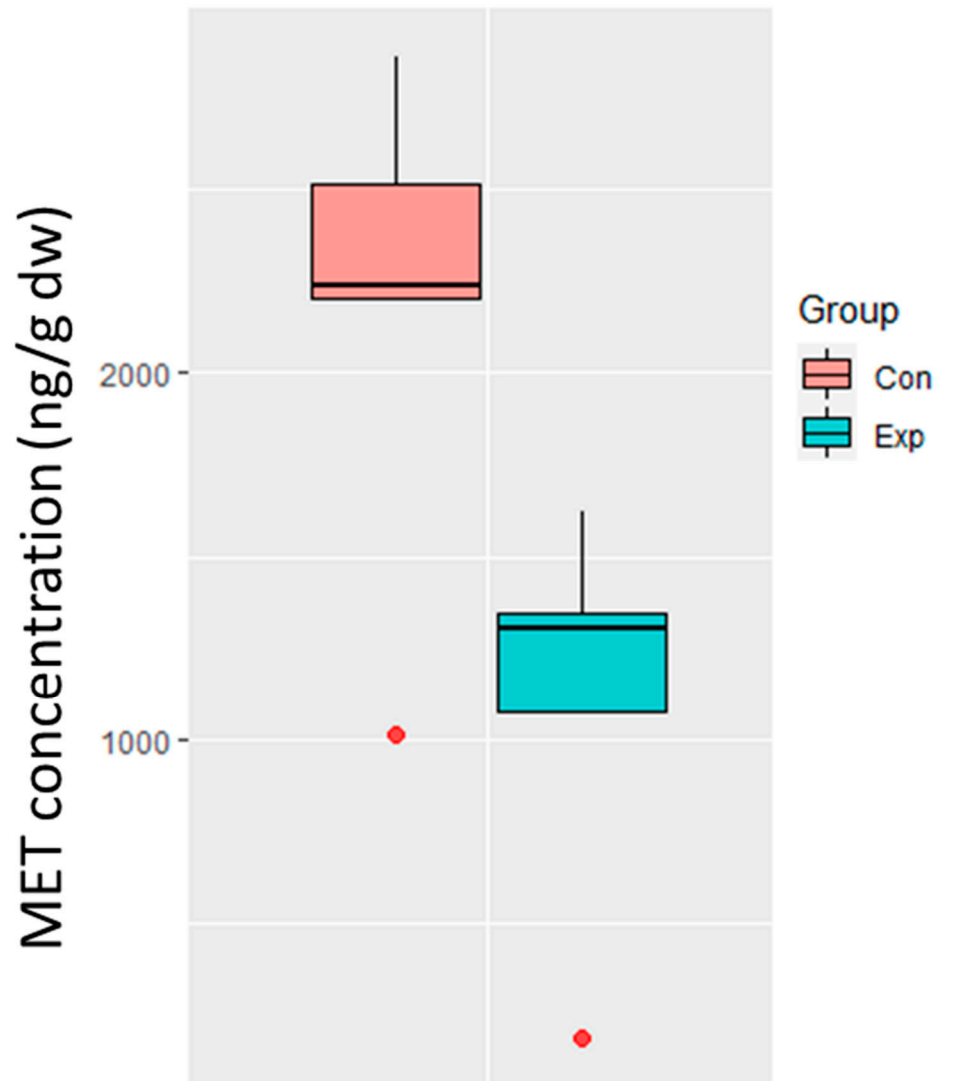

**Figure S1.** Comparison of methionine (MET) levels (ng/g dw) in the apex of exposed (blue) and control (red) plants of *V. faba* ( $n = 5$  per treatment).
